# Supplementary material
Source: publisher figshare collection journal article supplement (https://wellcome.figshare.com/ndownloader/files/26380006)
Supplement: Supplementary file 1 [file 26380006]

It is important that your data are Findable, Accessible, Interoperable, and Reusable (FAIR). The following guides will help you make your data FAIR:

- [Guidance from our data champions.](#)
- [Guidance from the Wellcome Open Research Early Career Researchers Advisory Board.](#)
- [Guide to making data FAIR.](#)

## PLANNING

Here are some quick guides to help direct you when it comes to preparing and organising your data.

- [Formatting your data in spreadsheets;](#)
- [Selecting an appropriate repository;](#)
- [Choosing an appropriate license.](#)

## PROCESSING

- To maximise your data for re-use, head to our page on [Data Notes](#).
- Read our [collection of data stories](#), where researchers share the challenges, learnings and benefits of making their data open.

## RE-USE

## SUCCESSFUL APPLICATION

## COLLECTION & ANALYSIS

Managing data collection can seem daunting. Here are some [data collection tips and resources](#), supplied by our data champions.

## PUBLISHING & SHARING

- Ease anxieties you have about sharing your data with our [myth busting piece](#).
- If you have concerns about protecting research participants, while openly sharing your data, see this [guide on sharing sensitive personal data](#).

© 2021. This work is licensed under a [CC BY-SA 4.0 license](#)

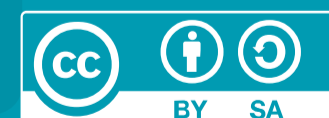

Wellcome Open Research

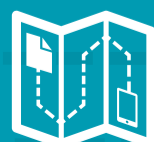

Have a go at the [Research Data Management Adventure Game](#), helping you work through a project from its very beginnings to its closing stages.
